# Supplementary material for: PARP Inhibitor Upregulates PD-L1 Expression and Enhances Cancer-Associated Immunosuppression
Source: Oxford University Press journal article supplement (doi:10.1158/1078-0432.ccr-16-3215), 2017-02-06
Supplement: 10780432ccr163215-sup-176471_1_supp_3838881_skcqgd.doc [file 10780432ccr163215-sup-176471_1_supp_3838881_skcqgd.doc]

**Supplementary Information**

**
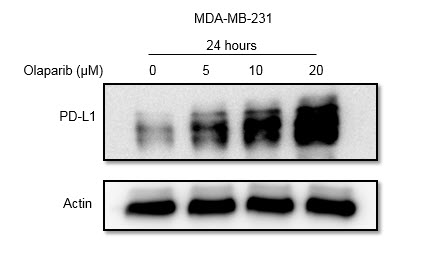
**

**Supplementary Figure S1. PARPi upregulates PD-L1 in a dose-dependent manner in MD-MB-231 cells.** MDA-MB-231 cells were treated with the indicated concentrations of olaparib for 24 hours. Cell lysates were harvested and subjected to western blot with the indicated antibodies.


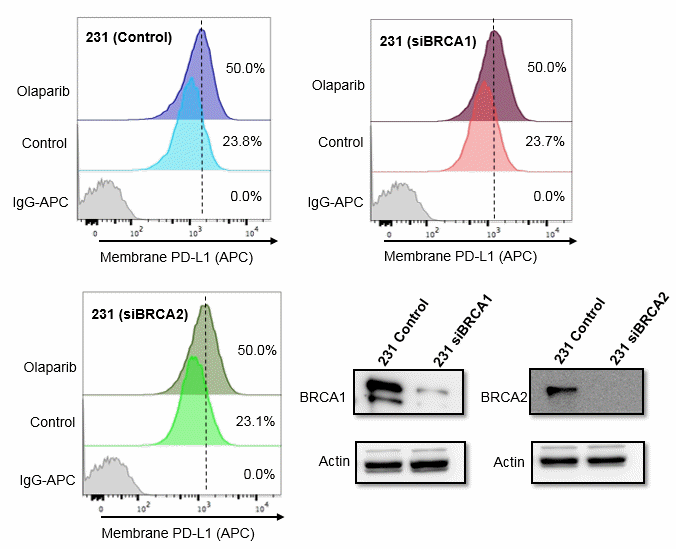


**Supplementary Figure S2. Downregulation of *BRCA1* or *BRCA2* has no effect on PARPi-induced PD-L1 upregulation.** MDA-MB-231 cells were transfected with the indicated siRNA to knock down *BRCA1* or *BRCA2*. After 36 hours of transfection, cell were treated with 10 µM olaparib for 24 hours and subjected to FACS analysis. MDA-MB-231 cells stained with IgG-APC were set as isotype controls. Western blot showing *BRCA* knockdown by siRNA.


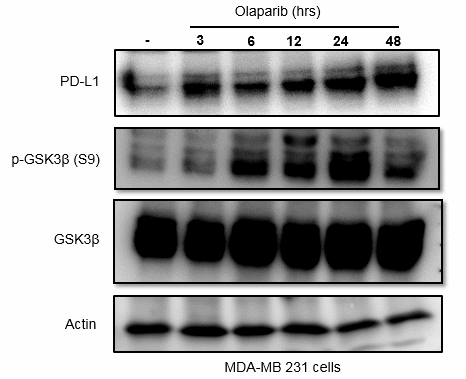


**Supplementary Figure S3. PARPi inactivates GSK3β.** MDA-MB-231 cells were treated with 10 µM olaparib for the indicated time, and subjected to Western blotting with the indicated antibodies.


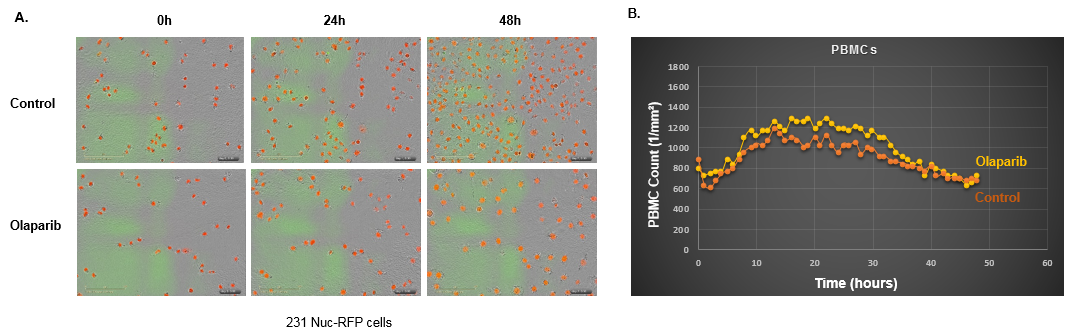


**Supplementary Figure S4. PARPi blocks cell proliferation of MDA-MB-231 cells but not activated PBMCs.** (A) Representative images of MDA-MB-231 (Nuc-RFP) cells incubated with activated PBMCs treated with or without olaparib (10 μM) at the indicated time points. Images were taken using the IncuCyte Zoom microscope. (B) Activated PBMCs were treated with or without olaparib (10 μM). The IncuCyte Zoom microscope was used to take time-lapse images.


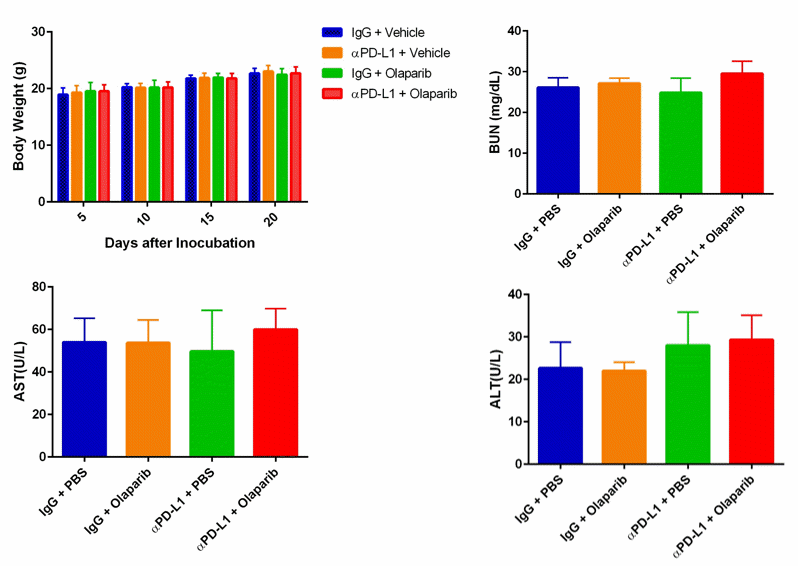


**Supplementary Figure S5. Toxicity assessment of treatment on BALB/c mice.** The body weight was measured every 5 days, and mice liver, and kidney functions were tested at the end of the experiments. BUN, blood urea nitrogen; ALT, alanine aminotransferase; AST, aspartate aminotransferase.

**Supplementary Movie S1. PARPi treatment inhibits cell proliferation of MDA-MB-231 cells.** Time-lapse video of 231 (Nuc-RFP) cells without olaparib (control) taken using the IncuCyte Zoom microscope.

**Supplementary Movie S2. PARPi treatment inhibits cell proliferation of MDA-MB-231 cells.** Time-lapse video of 231 (Nuc-RFP) cells with olaparib taken using the IncuCyte Zoom microscope.

**Supplementary Movie S3. PARPi treatment enhances resistance to activated T-cell killing.** Time-lapse video of 231 (Nuc-RFP) cells without olaparib treatment (control) co-cultured with activated PBMCs taken using the IncuCyte Zoom microscope.

**Supplementary Movie S4. PARPi treatment enhances resistance to activated T-cell killing.** Time-lapse video of 231 (Nuc-RFP) cells with olaparib treatment co-cultured with activated PBMCs taken using the IncuCyte Zoom microscope.
